# Supplementary material for: Preclinical Evaluation of a Lead Specific Chelator (PSC) Conjugated to Radiopeptides for 203Pb and 212Pb-Based Theranostics
Source: MDPI journal article supplement (doi:10.3390/pharmaceutics15020414), 2023-01-26
Supplement: s1 [file s1]

## Article

# Supplementary Material: Preclinical Evaluation of a Lead Specific Chelator (PSC) Conjugated to Radiopeptides for $^{203}\text{Pb}$ and $^{212}\text{Pb}$ -Based Theranostics

Mengshi Li, Nicholas J. Baumhover, Dijie Liu, Brianna S. Cagle, Frédéric Boschetti, Guillaume Paulin, Dongyoul Lee, Zhiming Dai, Ephraim R. Obot, Brenna M. Marks, Ibrahim Okeil, Edwin A. Sagastume, Moustafa Gabr, F. Christopher Pigge, Frances L. Johnson and Michael K. Schultz

**Table S1.** Time-dependent normalization factors for the measurement of  $^{212}\text{Pb}$  radioactivity.

| Time since purification of $^{212}\text{Pb}$                                                                                                                                                                                                                                                                                                                                           | Normalization Factors* |
|----------------------------------------------------------------------------------------------------------------------------------------------------------------------------------------------------------------------------------------------------------------------------------------------------------------------------------------------------------------------------------------|------------------------|
| 25 min                                                                                                                                                                                                                                                                                                                                                                                 | 2.65                   |
| 30 min                                                                                                                                                                                                                                                                                                                                                                                 | 2.52                   |
| 35 min                                                                                                                                                                                                                                                                                                                                                                                 | 2.29                   |
| 45 min                                                                                                                                                                                                                                                                                                                                                                                 | 2.04                   |
| 55 min                                                                                                                                                                                                                                                                                                                                                                                 | 1.87                   |
| 1 h 15 min                                                                                                                                                                                                                                                                                                                                                                             | 1.59                   |
| 1 h 20 min                                                                                                                                                                                                                                                                                                                                                                             | 1.51                   |
| 1 h 35 min                                                                                                                                                                                                                                                                                                                                                                             | 1.42                   |
| 1 h 47 min                                                                                                                                                                                                                                                                                                                                                                             | 1.33                   |
| 1 h 50 min                                                                                                                                                                                                                                                                                                                                                                             | 1.3                    |
| 2 h                                                                                                                                                                                                                                                                                                                                                                                    | 1.28                   |
| 2h 8 min                                                                                                                                                                                                                                                                                                                                                                               | 1.24                   |
| 2 h 20 min                                                                                                                                                                                                                                                                                                                                                                             | 1.21                   |
| 2h 30 min                                                                                                                                                                                                                                                                                                                                                                              | 1.19                   |
| 2 h 45 min                                                                                                                                                                                                                                                                                                                                                                             | 1.14                   |
| 3 h                                                                                                                                                                                                                                                                                                                                                                                    | 1.13                   |
| 3 h 10 min                                                                                                                                                                                                                                                                                                                                                                             | 1.12                   |
| 3 h 20                                                                                                                                                                                                                                                                                                                                                                                 | 1.1                    |
| 3 h 35 min                                                                                                                                                                                                                                                                                                                                                                             | 1.09                   |
| 3 h 40 min                                                                                                                                                                                                                                                                                                                                                                             | 1.09                   |
| 4 h                                                                                                                                                                                                                                                                                                                                                                                    | 1.07                   |
| 4 h 30 min                                                                                                                                                                                                                                                                                                                                                                             | 1.05                   |
| 5 h                                                                                                                                                                                                                                                                                                                                                                                    | 1.04                   |
| 5 h 30 min                                                                                                                                                                                                                                                                                                                                                                             | 1.03                   |
| 6 h                                                                                                                                                                                                                                                                                                                                                                                    | 1.02                   |
| $^{212}\text{Pb}/^{212}\text{Bi}$ equilibrium                                                                                                                                                                                                                                                                                                                                          | 1 (Dial# 690)          |
| <p><b>*Note:</b><br/> <math>A_{\text{Real}} = A_{\text{Read}} \times F</math><br/>           where <math>A_{\text{Real}}</math> is the real radioactivity, <math>A_{\text{Read}}</math> is the measured radioactivity under Dial# 760 for in 20 mL LSC vials, 10 mL ALK glass vial and 20 mL ALK glass vial. #790 for 1.5 mL tube and 3 mL syringe. #672 for 30 mL ALK glass vial.</p> |                        |
